# Supplementary material
Source: publisher figshare collection journal article supplement (https://acs.figshare.com/ndownloader/files/28861372)
Supplement: Supplementary file 1 [file 28861372]

**Early aggregation kinetics of Alzheimer's A $\beta$ <sub>16-21</sub> in the presence of  
ultrafine fullerene particle and ammonium nitrate**

**Supplementary Material**

Samal Kaumbekova<sup>1</sup> and Dhawal Shah<sup>1\*</sup>

<sup>1</sup>Department of Chemical and Materials Engineering, School of Engineering and Digital  
Sciences, Nazarbayev University, Nur-Sultan, 010000, Kazakhstan.

\*Corresponding Author: [dhawal.shah@nu.edu.kz](mailto:dhawal.shah@nu.edu.kz)

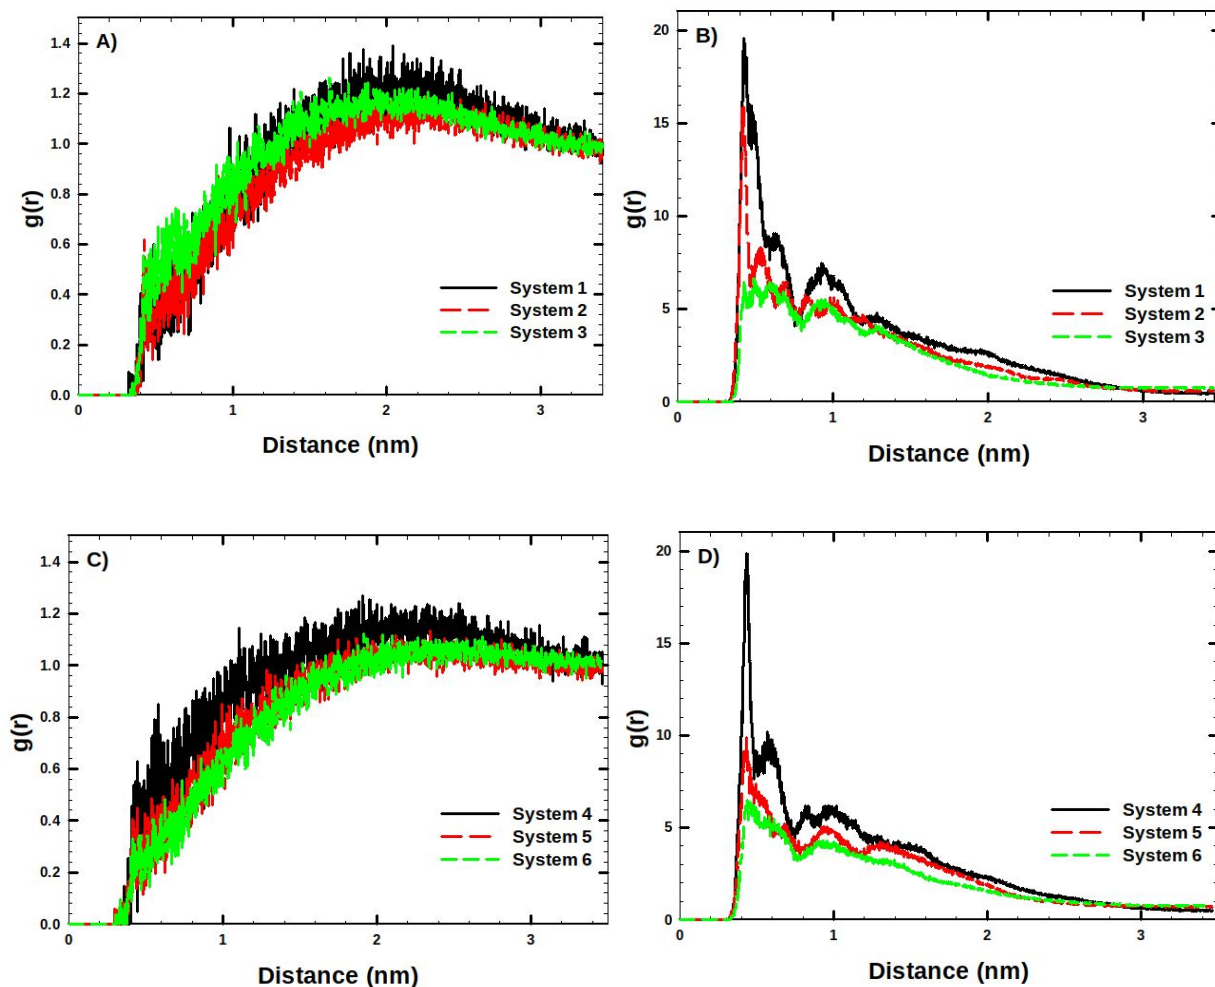

**Figure S1.** Radial distribution function ( $g(r)$ ) based on the center of mass A) peptide – ammonia interactions in systems with no UFP (systems 1 – 3), B) peptide – nitrate interactions in systems with no UFP (systems 1 – 3), C) peptide – ammonia interactions in systems with UFP (systems 4 – 6), D) peptide – nitrate interactions in systems with UFP (systems 4 – 6).

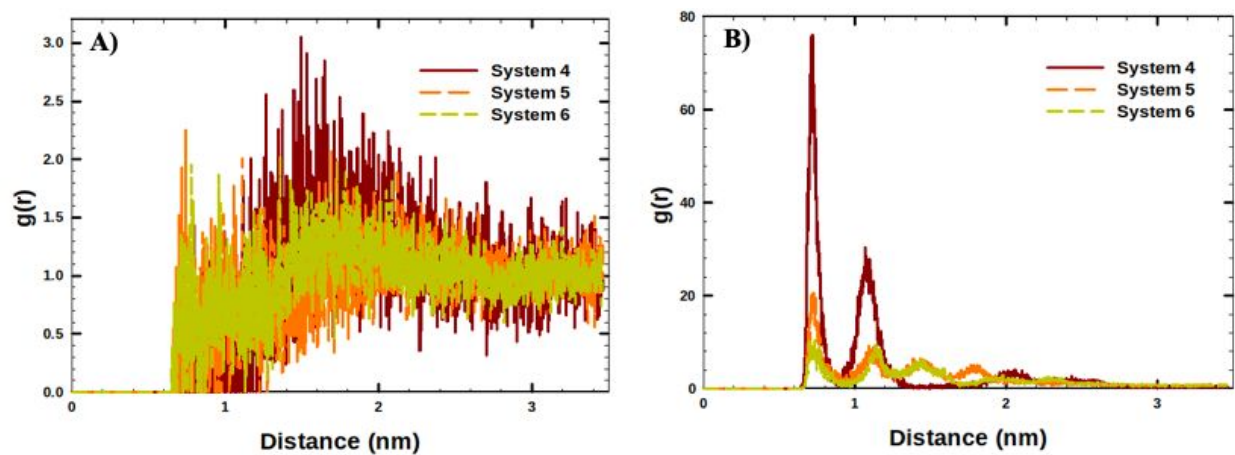

**Figure S2.** Radial distribution function ( $g(r)$ ) based on the center of mass in systems with UFP (systems 4 – 6 A)  $C_{60}$ – ammonia interactions), B)  $C_{60}$ – nitrate interactions.
